# Supplementary material for: The Defect Passivation of Tin Halide Perovskites Using a Cesium Iodide Modification
Source: MDPI journal article supplement (doi:10.3390/molecules28176414), 2023-09-03
Supplement: s1 [file s1]

# Support Information

## The Defect Passivation of Tin Halide Perovskites Using a Cesium Iodide Modification

Linfeng He <sup>1</sup>, Jin Cheng <sup>1,\*</sup>, Longjiang Zhao <sup>2</sup>, Xinyao Chen <sup>1,3</sup>, Xiaoping Zou <sup>1</sup>,  
Chunqian Zhang <sup>1</sup> and Junming Li <sup>1,4</sup>

<sup>1</sup> Beijing Key Laboratory for Sensor, School of Applied Science, Beijing Information Science and Technology University, Beijing 100101, China.

<sup>2</sup> College of Engineering, Qufu Normal University, Rizhao 276826, China.

<sup>3</sup> School of Instrument Science and Opto-Electronics Engineering, Beijing Information Science and Technology University, Beijing 100101, China.

<sup>4</sup> Fujian Key Laboratory of Electrochemical Energy Storage Materials, Fuzhou University,  
Fuzhou 350002, China

\* Correspondence: chengjin@bistu.edu.cn

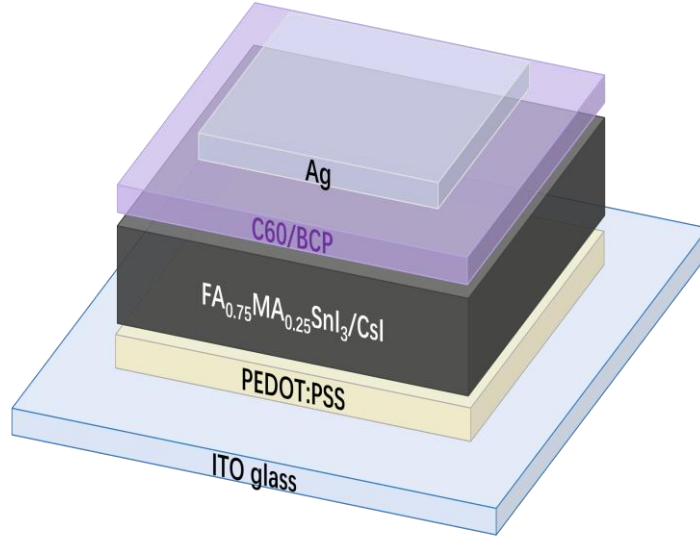

**Figure S1.** Schematic view of the inverted  $\text{FA}_{0.75}\text{MA}_{0.25}\text{SnI}_3$  perovskite solar cells structure with/without CsI thin passivation layer.

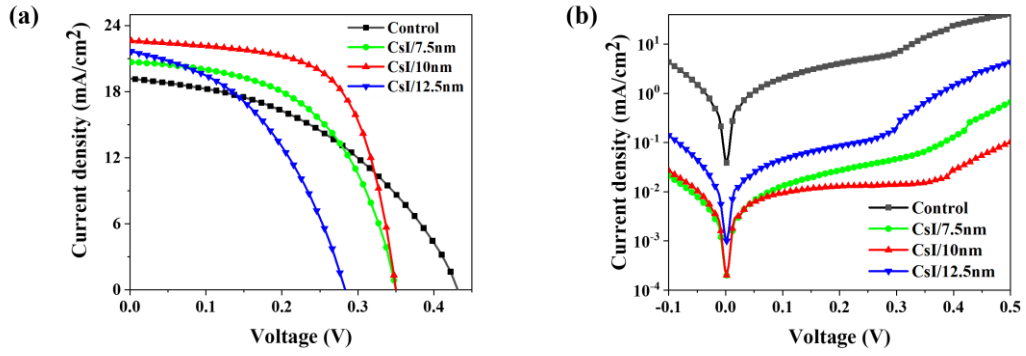

**Figure S2.** (a) Light current density-voltage (light  $J$ - $V$ ) characteristic curves; (b) Dark current density-voltage characteristic curves (dark  $J$ - $V$ ) of the  $\text{FA}_{0.75}\text{MA}_{0.25}\text{SnI}_3$  Sn based perovskite solar cells with thin CsI passivation layers (0 nm, 7.5 nm, 10 nm, 12.5 nm).

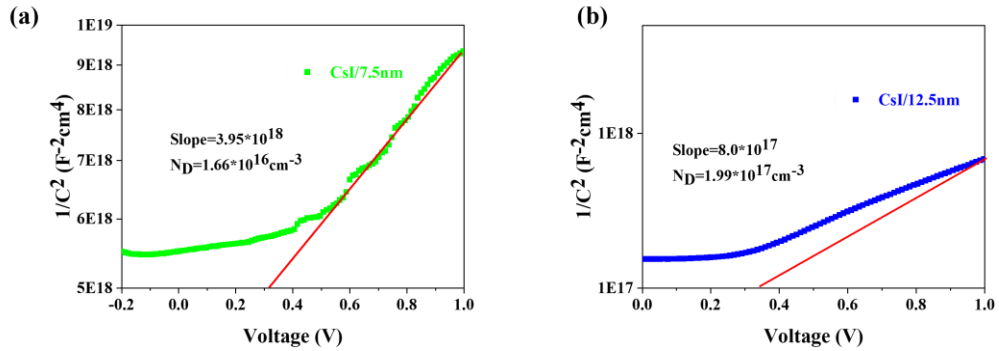

**Figure S3.** Capacitance-Voltage ( $C$ - $V$ ) characteristic curves of the  $\text{FA}_{0.75}\text{MA}_{0.25}\text{SnI}_3$  Sn based perovskite films spin-coated on PEDOT:PSS layer with varied thickness CsI (a) 7.5 nm and (b) 12.5 nm.

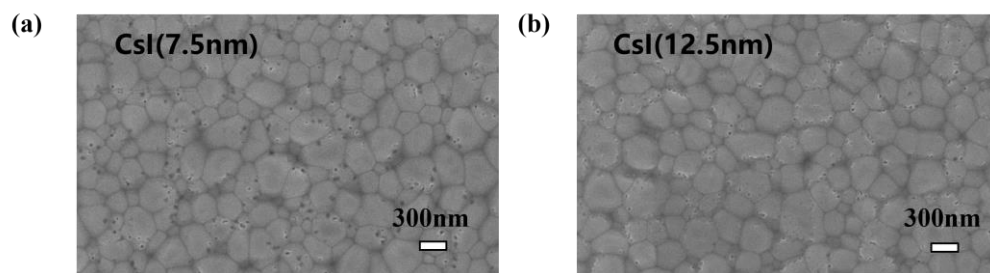

**Figure S4.** Top-view SEM images of the  $\text{FA}_{0.75}\text{MA}_{0.25}\text{SnI}_3$  perovskite films spin-coated on PEDOT:PSS layer with varied thickness CsI: (a) 7.5 nm and (b) 12.5 nm.

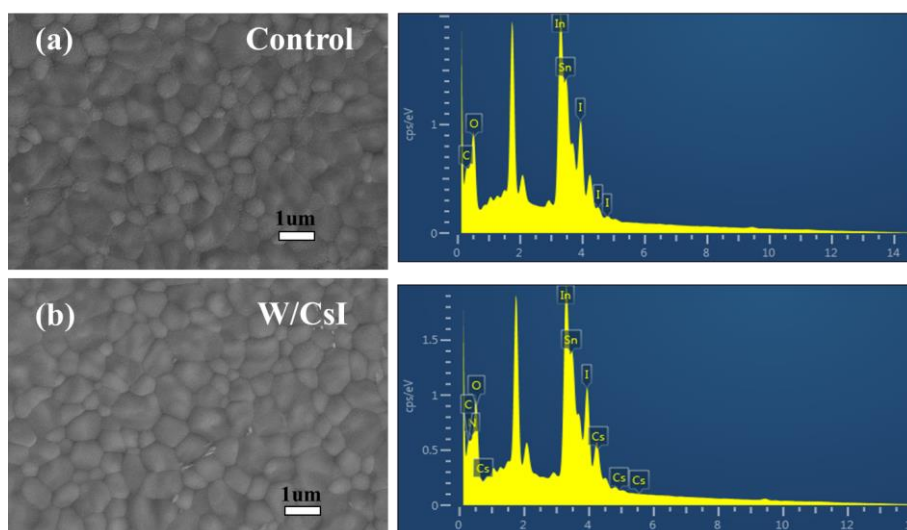

**Figure S5.** Energy Dispersive Spectrometer (EDS) spectrum of the  $\text{FA}_{0.75}\text{MA}_{0.25}\text{SnI}_3$  perovskite films spin-coated on ITO substrate (a) without CsI layer modification (control); (b) with CsI layer modification (W/CsI).

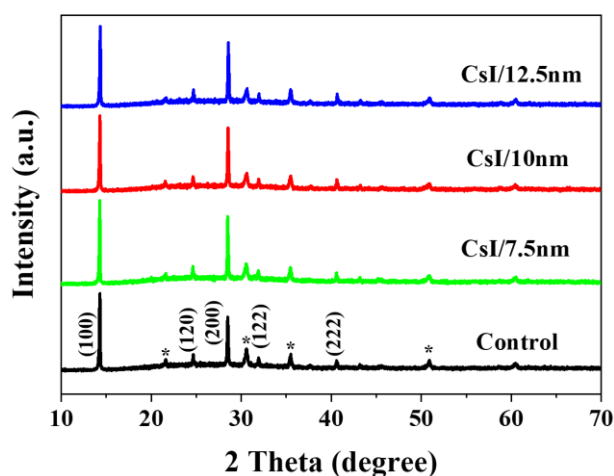

**Figure S6.** X-Ray Diffraction (XRD) patterns of  $\text{FA}_{0.75}\text{MA}_{0.25}\text{SnI}_3$  perovskite films spin-coated on PEDOT:PSS layer with varied thickness CsI (0 nm, 7.5 nm, 10 nm, 12.5 nm) and \* is represent the peak of ITO.

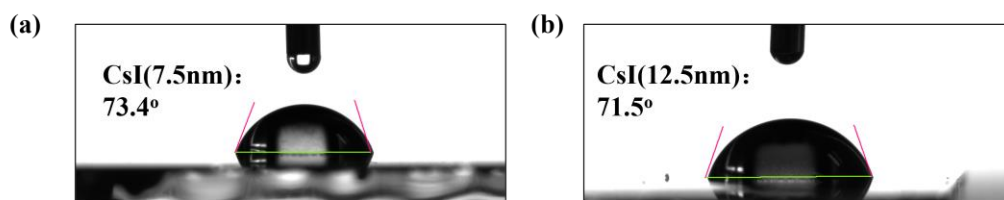

**Figure S7.** Contact angle measurement of deionized water on  $\text{FA}_{0.75}\text{MA}_{0.25}\text{SnI}_3$  Sn based perovskite films spin-coated on PEDOT:PSS layer with varied thickness CsI (7.5 nm, 12.5 nm).
